# Supplementary material for: α-synuclein strains that cause distinct pathologies differentially inhibit proteasome
Source: eLife. 2020 Jul 22;9:e56825. doi: 10.7554/eLife.56825 (PMC7406352; doi:10.7554/eLife.56825)
Supplement: Figure 1—source data 1. [file elife-56825-fig1-data1.xlsx]

## Sheet: 1B
0.0473
0.0478
0.0485	0.0478667	0.000492161	0.000284158		0.0478667	0.000492161	0.000284158
0.0845					0.0792333	0.00511816	0.00295506
0.0809
0.0723	0.0792333	0.00511816	0.00295506
				1	0.0473
				1	0.0478
				1	0.0485
				2	0.0845
				2	0.0809
				2	0.0723

## Sheet: 1D
17022
20287
16396					17901.7	1705.94	984.923	17901.7	1705.94	984.923
37346								32872.3	3254.66	1879.08
29698								188	6.16441	3.55903
31573					32872.3	3254.66	1879.08
187
196
181					188	6.16441	3.55903
		1	17022
		1	20287
		1	16396
		2	37346
		2	29698
		2	31573				2-1 14970.67 8461.14 21480.19 0.0009893
		3	187				3-1 -17713.67 -24223.19 -11204.14 0.0003935
		3	196				3-2 -32684.33 -39193.86 -26174.81 0.0000113
		3	181

## Sheet: 1E
		B	ｍ	ｍ	ｍ	ー	ー	ー	＋	＋	＋	B	B
	540	0.1078	0.1107	0.1083	0.1094	0.1983	0.2153	0.2023	0.2379	0.2394	0.2348	0.1079	0.1045
	477	0.1518	0.1519	0.1481	0.1496	0.165	0.1833	0.1669	0.1968	0.1968	0.1937	0.1525	0.1487
9.72355e-07	9.20004e-07	9.83519e-07	1.09601e-06	1.08319e-06	1.09428e-06	4.27624e-06	4.55311e-06	4.39334e-06	5.15503e-06	5.21433e-06	5.09942e-06	9.72355e-07	9.20004e-07
		9.58626e-07	9.99843e-07	1.05424e-06	1.09116e-06	2.15124e-06	3.30788e-06	4.40757e-06	4.7005e-06	4.9209e-06	5.15626e-06
		2.76874e-08	7.27738e-08	5.02791e-08	5.67972e-09	1.50261e-06	1.56932e-06	1.13479e-07	3.27957e-07	3.73825e-07	4.69192e-08
		9.58626e-07	1.09116e-06	4.40757e-06	5.15626e-06
		2.76874e-08	5.67972e-09	1.13479e-07	4.69192e-08
		4.40757e-06	5.15626e-06	1.09116e-06
		1.13479e-07	4.69192e-08	5.67972e-09
		1.09601e-06	1.08319e-06	1.09428e-06	4.27624e-06	4.55311e-06	4.39334e-06	5.15503e-06	5.21433e-06	5.09942e-06
					1	1.09601e-06			1.09116e-06
					1	1.08319e-06
					1	1.09428e-06	1.09116e-06	5.67972e-09	1	0.00520522	0.00300532
					2	4.27624e-06					0
					2	4.55311e-06					0
					2	4.39334e-06	4.40757e-06	1.13479e-07	4.03934	0.103999	0.0600454
					3	5.15503e-06					0
					3	5.21433e-06					0
					3	5.09942e-06	5.15626e-06	4.69192e-08	4.72549	0.0429994	0.0248265
									4.03934	0.0600454
									4.72549	0.0248265
									1	0.00300532
							diff lwr upr p adj
							2-1 0.0000033164033 0.0000030986419 0.0000035341647 0.0000000
							3-1 0.0000040651000 0.0000038473386 0.0000042828614 0.0000000
							3-2 0.0000007486967 0.0000005309353 0.0000009664581 0.0001052
						1.09601e-06		1.00444		1	3.91899
						1.08319e-06		0.992695		1	4.17273
						1.09428e-06	1.09116e-06	1.00286		1	4.02631
						4.27624e-06		3.91899		2	4.72436
						4.55311e-06		4.17273		2	4.77871
						4.39334e-06	4.40757e-06	4.02631		2	4.6734
						5.15503e-06		4.72436		3	1.00444
						5.21433e-06		4.77871		3	0.992695
						5.09942e-06	5.15626e-06	4.6734		3	1.00286
