# Supplementary material for: α-synuclein strains that cause distinct pathologies differentially inhibit proteasome
Source: eLife. 2020 Jul 22;9:e56825. doi: 10.7554/eLife.56825 (PMC7406352; doi:10.7554/eLife.56825)
Supplement: Figure 1—source data 2. [file elife-56825-fig1-data2.xlsx]

## Sheet: Sheet2
Cycle Nr.	1	2	3	4	5	6	7	8	9	10	11	12	13	14	15	16	17	18	19	20	21	22	23	24	25	26	27	28	29	30	31	32	33	34	35	36	37	38	39	40	41	42	43	44	45	46	47	48	49
Time [s]	0	120	240	360	480	600	720	840	960	1080	1200	1320	1440	1560	1680	1800	1920	2040	2160	2280	2400	2520	2640	2760	2880	3000	3120	3240	3360	3480	3600	3720	3840	3960	4080	4200	4320	4440	4560	4680	4800	4920	5040	5160.1	5280	5400	5520	5640	5760.1
Temp. [°C]	37	37	36.8	37	36.9	37	37.1	37	37	36.8	37.1	36.8	37	37	37.2	37	37.2	37.2	37.1	37	37	36.9	37.2	37.1	37.2	37	37.1	37.2	37.1	36.9	37.2	37.1	37.2	36.7	37	37.2	37	37	37.2	37.1	37.3	37	36.9	37.2	36.9	37.1	37.1	37	37.1
B8	4	-1	-1	0	0	0	0	3	2	3	3	4	3	4	6	5	5	6	6	6	7	7	8	8	9	8	9	8	9	9	10	9	11	10	10	10	11	11	11	10	11	10	11	11	12	10	12	11	11
C8	1	-1	0	-2	0	2	1	2	2	2	3	3	3	5	5	6	6	6	7	6	7	7	7	8	8	9	8	9	9	10	9	9	9	10	10	9	10	9	11	11	10	11	12	11	12	11	10	12	11
D8	2	-1	0	0	1	2	2	2	2	3	3	5	5	6	5	6	7	7	7	7	8	8	8	8	9	8	8	8	8	10	10	10	10	10	10	10	11	11	10	11	11	11	11	11	12	11	12	12	12
B9	162	178	194	210	224	241	254	270	284	298	311	323	337	348	358	370	381	387	396	405	413	419	425	435	441	449	457	466	471	479	487	488	497	510	513	522	530	546	551	555	562	567	572	578	585	594	600	604	613
C9	146	162	177	190	205	216	230	243	257	270	283	294	307	317	328	337	348	357	368	378	387	396	405	413	419	428	437	448	455	463	472	480	484	493	504	513	521	533	543	557	566	575	586	597	608	614	623	629	631
D9	145	163	179	192	207	219	232	246	261	274	284	296	308	320	329	340	351	361	370	379	386	396	402	413	419	424	435	440	447	452	462	473	486	494	503	513	518	531	544	553	560	565	574	581	591	599	599	604	611
B10	222	245	267	286	306	325	346	367	387	407	427	447	463	482	500	515	529	541	549	564	575	586	592	603	625	647	659	679	693	714	731	740	757	769	781	791	800	812	824	824	838	845	852	864	883	893	900	898	894
C10	211	235	253	271	293	309	329	349	369	389	408	424	443	460	477	492	505	522	534	546	559	569	580	589	600	608	617	631	639	654	669	680	691	703	713	725	736	750	757	763	773	786	801	816	830	842	840	842	855
D10	210	237	257	278	296	316	333	353	373	393	411	427	448	464	482	500	517	533	539	556	570	581	593	604	620	633	656	668	685	700	719	728	748	766	774	786	798	811	824	822	829	836	847	860	869	876	894	894	900
Cycle Nr.	1	2	3	4	5	6	7	8	9	10	11	12	13	14	15	16	17	18	19	20	21	22	23	24	25	26	27	28	29	30	31	32	33	34	35	36	37	38	39	40	41	42	43	44	45	46	47	48	49
Time [s]	0	120	240	360	480	600	720	840	960	1080	1200	1320	1440	1560	1680	1800	1920	2040	2160	2280	2400	2520	2640	2760	2880	3000	3120	3240	3360	3480	3600	3720	3840	3960	4080	4200	4320	4440	4560	4680	4800	4920	5040	5160.1	5280	5400	5520	5640	5760.1
Temp. [°C]	0	0.0333333	0.0666667	0.1	0.133333	0.166667	0.2	0.233333	0.266667	0.3	0.333333	0.366667	0.4	0.433333	0.466667	0.5	0.533333	0.566667	0.6	0.633333	0.666667	0.7	0.733333	0.766667	0.8	0.833333	0.866667	0.9	0.933333	0.966667	1	1.03333	1.06667	1.1	1.13333	1.16667	1.2	1.23333	1.26667	1.3	1.33333	1.36667	1.4	1.43336	1.46667	1.5	1.53333	1.56667	1.60003
B8	4	-1	-1	0	0	0	0	3	2	3	3	4	3	4	6	5	5	6	6	6	7	7	8	8	9	8	9	8	9	9	10	9	11	10	10	10	11	11	11	10	11	10	11	11	12	10	12	11	11
C8	1	-1	0	-2	0	2	1	2	2	2	3	3	3	5	5	6	6	6	7	6	7	7	7	8	8	9	8	9	9	10	9	9	9	10	10	9	10	9	11	11	10	11	12	11	12	11	10	12	11
D8	2	-1	0	0	1	2	2	2	2	3	3	5	5	6	5	6	7	7	7	7	8	8	8	8	9	8	8	8	8	10	10	10	10	10	10	10	11	11	10	11	11	11	11	11	12	11	12	12	12
B9	162	178	194	210	224	241	254	270	284	298	311	323	337	348	358	370	381	387	396	405	413	419	425	435	441	449	457	466	471	479	487	488	497	510	513	522	530	546	551	555	562	567	572	578	585	594	600	604	613
C9	146	162	177	190	205	216	230	243	257	270	283	294	307	317	328	337	348	357	368	378	387	396	405	413	419	428	437	448	455	463	472	480	484	493	504	513	521	533	543	557	566	575	586	597	608	614	623	629	631
D9	145	163	179	192	207	219	232	246	261	274	284	296	308	320	329	340	351	361	370	379	386	396	402	413	419	424	435	440	447	452	462	473	486	494	503	513	518	531	544	553	560	565	574	581	591	599	599	604	611
B10	222	245	267	286	306	325	346	367	387	407	427	447	463	482	500	515	529	541	549	564	575	586	592	603	625	647	659	679	693	714	731	740	757	769	781	791	800	812	824	824	838	845	852	864	883	893	900	898	894
C10	211	235	253	271	293	309	329	349	369	389	408	424	443	460	477	492	505	522	534	546	559	569	580	589	600	608	617	631	639	654	669	680	691	703	713	725	736	750	757	763	773	786	801	816	830	842	840	842	855
D10	210	237	257	278	296	316	333	353	373	393	411	427	448	464	482	500	517	533	539	556	570	581	593	604	620	633	656	668	685	700	719	728	748	766	774	786	798	811	824	822	829	836	847	860	869	876	894	894	900
[truncated: 959 more columns]
