# Supplementary material for: α-synuclein strains that cause distinct pathologies differentially inhibit proteasome
Source: eLife. 2020 Jul 22;9:e56825. doi: 10.7554/eLife.56825 (PMC7406352; doi:10.7554/eLife.56825)
Supplement: Figure 3—source data 1. [file elife-56825-fig3-data1.xlsx]

## Sheet: 3Dleft
					0.0814307	0.0135034	0.0664062		0.0537801	0.029133	0.0168199
					1	1	1		1	0	0
					0.490868	0.470368	0.309896		0.42371	0.080913	0.0467151
		1	0.0814307
		1	0.0135034
		1	0.0664062
		2	1
		2	1
		2	1
		3	0.490868
		3	0.470368
		3	0.309896

## Sheet: 3Dright
			1	1		1	0
			1	1
			1	1
			2	1.6954		1.63012	0.102963
			2	1.48476
			2	1.7102
			3	1.11698		0.96956	0.104595
			3	0.885341
			3	0.906358
					1.28761	0.960262
					1.16801	1.03451
			1	0	1.46142	0.939161						1	0	0
			1.30568	0.147536	0.0851823							1.63012	0.102963	0.0594476
			0.977979	0.0500842	0.028917							0.96956	0.104595	0.0603899		2-1 0.63012163 0.3701220 0.8901212 0.0007446
																3-1 -0.03043976 -0.2904394 0.2295598 0.9321248
							1	0	0							3-2 -0.66056139 -0.9205610 -0.4005618 0.0005751
							1.30568	0.147536	0.0851823
							0.977979	0.0500842	0.028917

## Sheet: 3-S2C
								Syn-	syn+
								554	1084
								649	1181
								591	1017
								598	1094
								39.0982	67.3251
								0.0024719
								1	1.82943
								0.0653816	0.112584
								0.0377492	0.0650022
