# Supplementary material for: α-synuclein strains that cause distinct pathologies differentially inhibit proteasome
Source: eLife. 2020 Jul 22;9:e56825. doi: 10.7554/eLife.56825 (PMC7406352; doi:10.7554/eLife.56825)
Supplement: Figure 4—source data 1. [file elife-56825-fig4-data1.xlsx]

## Sheet: 4A
LLVY
	768	6459	5691			5691	1977	4858
	384	2361	1977			6001	2072	4550
	669	5527	4858			6922	2112	5315
	782	6783	6001			6204.67	2053.67	4907.67
	374	2446	2072			640.274	69.3421	384.911
	607	5157	4550			369.673	40.0359	222.235				2-1 -4151 -5236.199 -3065.8011 0.0000570
	569	7491	6922									3-1 -1297 -2382.199 -211.8011 0.0244295
	290	2402	2112			1	0.330987	0.790964				3-2 2854 1768.801 3939.1989 0.0004754
	544	5859	5315			0.103192	0.0111758	0.0620357
						0.0595798	0.00645254	0.0358174
						5691	1	0.917213
						6001	1	0.967175
						6922	1	1.11561
						1977	2	0.318631
						2072	2	0.333942
						2112	2	0.340389
						4858	3	0.782959
						4550	3	0.733319
						5315	3	0.856613

## Sheet: 4B
191	185.667	4.6188	2.66674
183	135	83.1384	48.0014
183	93.3333	78.2326	45.1689
39	40	17.5214	10.1163
58	80.6667	71.7379	41.4191
23	121.667	86.031	49.6715
161	162	18.5203	10.693
181	162.5	26.163	15.1056	2-1 -145.66667 -183.14300 -108.19034 0.0000519
144	144	#DIV/0!		3-1 -23.66667 -61.14300 13.80966 0.2087097
				3-2 122.00000 84.52367 159.47633 0.0001437
	185.667	4.6188	2.66674
	40	17.5214	10.1163
	162	18.5203	10.693
	1	0.0248768	0.0143631
	0.21544	0.0943703	0.0544863
	0.872531	0.09975	0.0575924
				191	1	1.02872
				183	1	0.985636
				183	1	0.985636
				39	2	0.210053
				58	2	0.312387
				23	2	0.123878
				161	3	0.867144
				181	3	0.974864
				144	3	0.775582

## Sheet: 4C
	241		243	3.55903	4.3589
	240
	248
	101		92	8.28654	10.1489
	81						O-ANOVA	diff lwr upr p adj
	94							2-1 -151.00000 -188.05529 -113.94471 0.0000394
	248		226.333	18.8739	23.1157			3-1 -16.66667 -53.72195 20.38862 0.4076608
	229							3-2 134.33333 97.27805 171.38862 0.0000777
	202
			1
		1	243	3.55903	4.3589	2.51669
		2	92	8.28654	10.1489	5.85964
		3	226.333	18.8739	23.1157	13.3462
			1	0.0146462	0.0179379	0.0103567
			0.378601	0.034101	0.041765	0.0241137
			0.931413	0.0776702	0.0951261	0.0549227
	241	0.99177	1	0.99177
	240	0.987654	1	0.987654
	248	1.02058	1	1.02058
	101	0.415638	2	0.415638
	81	0.333333	2	0.333333
	94	0.386831	2	0.386831
	248	1.02058	3	1.02058
	229	0.942387	3	0.942387
	202	0.831276	3	0.831276
