# Supplementary material for: α-synuclein strains that cause distinct pathologies differentially inhibit proteasome
Source: eLife. 2020 Jul 22;9:e56825. doi: 10.7554/eLife.56825 (PMC7406352; doi:10.7554/eLife.56825)
Supplement: Figure 4—source data 2. [file elife-56825-fig4-data2.xlsx]

## Sheet: 4D
				1	1
				1	1
				1	0.961089
1	1	0.967762	0.996234	2	1
0.961089	0.988701	0.0240652	0.0053266	2	0.961089
0.942197	1	0.0138945	0.00307541	2	0.942197
0.967762	0.996234
0.0240652	0.0053266
0.0138945	0.00307541		0.115091
0

## Sheet: 4E
Rpn11
1	561
2	1419
3	867	0.329931				0.526256	0.174298	0.100631
4	2816	0.753499				0.949121	0.0341817	0.0197348
5	683	0.495337	0.526256	0.174298	0.100631	0.514711	0.0697505	0.0402705
6	1673	0.969966
7	3402	0.900927
8	1990	0.976471	0.949121	0.0341817	0.0197348
9	3635	0.611922
10	2496	0.451605
11	4208	0.480606	0.514711	0.0697505	0.0402705
12	1672
Syn
1	547
2	552
3	560
4	555
5	567
6	508
7	1422
8	1099
9	990
10	825
11	734
12	748
13	716
14	551
PS-Buf
1	2427
2	1483
3	1401
4	2896
5	2169
6	2166
7
8
9
10
11
12

## Sheet: 4G
		5495982	8228794	8224836		7.31654e+06	1.28733e+06	743239	7.31654	1.28733	0.743239
		3259561	3124893	4042730		3475728	404683	233644	3.47573	0.404683	0.233644
		0.0225837
			1	1	1
			5.49598	8.22879	8.22484
			2	2	2
			3.25956	3.12489	4.04273
