# Supplementary material for: α-synuclein strains that cause distinct pathologies differentially inhibit proteasome
Source: eLife. 2020 Jul 22;9:e56825. doi: 10.7554/eLife.56825 (PMC7406352; doi:10.7554/eLife.56825)
Supplement: Figure 5—source data 1. [file elife-56825-fig5-data1.xlsx]

## Sheet: 5F
	sup	ppt	total		ppt/total
buf	6532	9057	15589	0.419013	0.580987
C20	6953	6924	13877	0.501045	0.498955
buf	7038	5768	12806	0.549586	0.450414
C20	6897	4918	11815	0.583749	0.416251
buf	6008	5657	11665	0.515045	0.484955
C20	5358	4847	10205	0.525037	0.474963
				buf	C20
				0.580987	0.498955
				0.450414	0.416251
				0.484955	0.474963
				0.505452	0.46339
				0.206789
				0.0552413	0.0347416
				0.0318945	0.0200587

## Sheet: 5D
LLVY		buf	1	0.0803935	0.0464166
		C20	0.890256	0.0171009	0.00987347
LLE		buf	1	0.0512973	0.0296174
		C20	0.911227	0.0242131	0.0139798
LRR		buf	1	0.0372369	0.0214993
		C20	1.08178	0.041402	0.0239041
		c
